# Supplementary material for: The Effect of Essential Oils from Asteraceae Plants on Behavior and Selected Physiological Parameters of the Bird Cherry-Oat Aphid
Source: MDPI journal article supplement (doi:10.3390/molecules29071673), 2024-04-08
Supplement: s1 [file s1]

---

*Supplementary Material*

# **The Effect of Essential Oils from Asteraceae Plants on Behavior and Selected Physiological Parameters of the Bird Cherry-Oat Aphid**

**Paweł Czerniewicz <sup>1,\*</sup>, Hubert Sytykiewicz <sup>1</sup> and Grzegorz Chrzanowski <sup>2</sup>**

<sup>1</sup> Institute of Biological Sciences, Faculty of Natural Sciences, University of Siedlce, Prusa 14, 08-110 Siedlce, Poland; hubert.sytykiewicz@uws.edu.pl

<sup>2</sup> Institute of Biotechnology, University of Rzeszow, Zelwerowicza 8B, 35-601 Rzeszow, Poland; gchrzanowski@ur.edu.pl

\* Correspondence: pawel.czerniewicz@uws.edu.pl; Tel.: +48-25-643-1389

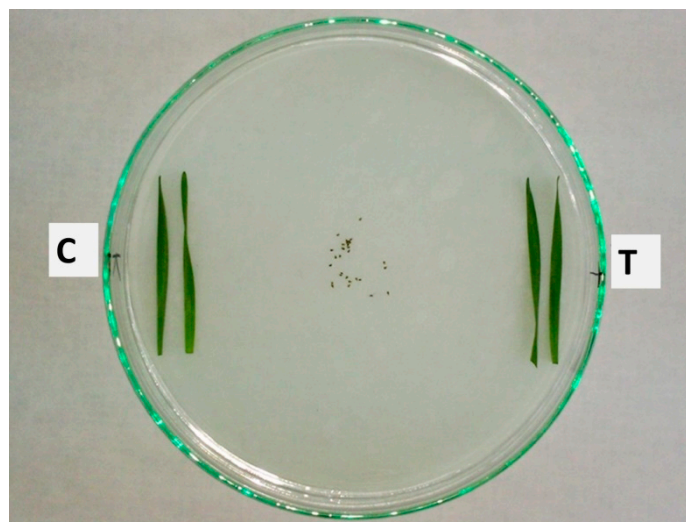

**Figure S1.** Bioassays of settling inhibition in *Rhopalosiphum padi*; C—control leaves; T—treated leaves; aphid females were placed in the centre of Petri dish (20 cm diameter).

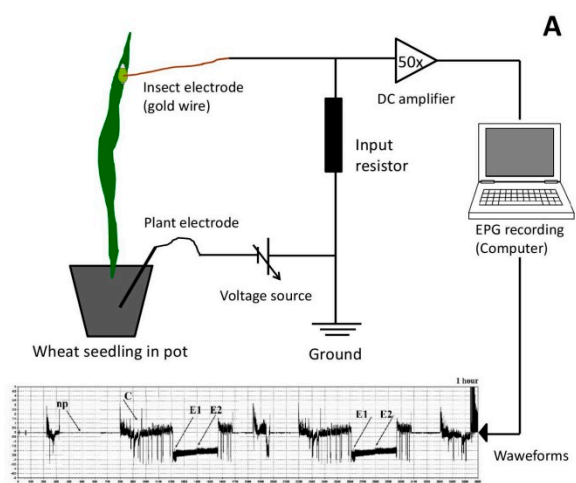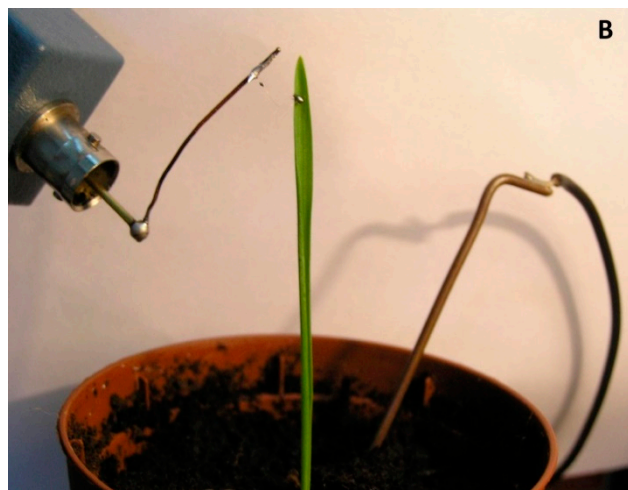

**Figure S2.** Analysis of aphid feeding behaviour by electronic penetration graph (EPG) technique; (A) EPG recording schematic diagram; (B) Bird cherry-oat aphid on wheat seedling during EPG recording.
